# Supplementary material for: Prevalence, Specificity and Determinants of Lipid-Interacting PDZ Domains from an In-Cell Screen and In Vitro Binding Experiments
Source: PubMed Central journal article supplement (PMC3563628; doi:10.1371/journal.pone.0054581), 2013-02-04
Supplement: pone.0054581.s005.pdf [file pone.0054581.s005.pdf]

**Table S1.** The state of purified recombinant His-tagged PDZ domains was assessed in different types of experiments until a conclusion was reached. SEC, size exclusion chromatography; CL, cross-linking; NG, Native Gel electrophoresis.

| <b>PDZ Domain</b> | <b>state</b>                                    | <b>methods</b> |
|-------------------|-------------------------------------------------|----------------|
| DFNB31_1          | Dimer with propensity to form oligomer.         | SEC and CL     |
| SCL9A3R2_1        | Monomer in equilibrium with dimer/tetramer      | SEC and NG     |
| IL16_1            | Dimer                                           | SEC, NG and CL |
| PARD3_1           | Monomer                                         | SEC, NG and CL |
| MAGI1_6           | Monomer                                         | SEC            |
| LNX1_4            | Dimer with propensity to form oligomer.         | CL             |
| SNTG1             | Monomer in equilibrium with dimer and oligomers | SEC and CL     |
| CASK              | Monomer                                         | SEC, NG and CL |
| SNTX27            | Monomer in equilibrium with dimer               | SEC and CL     |
| IL16_3            | Monomer                                         | SEC            |
| MAGI3_3           | Monomer                                         | SEC            |
| PDZD2_3           | Monomer                                         | SEC            |
| PDZD11            | Monomer                                         | SEC            |
| MPP7              | Monomer                                         | SEC            |
| DFNB31_3          | Propensity to form oligomer                     | CL             |
| MPDZ_6            | Monomer                                         | SEC            |
| MPDZ_7            | Monomer                                         | SEC            |
| ERBB2IP           | Monomer                                         | SEC            |
| SCRIB4            | Monomer /Dimer + propensity to form oligomers   | SEC and CL     |

SEC was directly performed on the purified proteins at 4°C on a Superdex 75 16/60 column (GE healthcare) in 25mM HEPES 150 mM NaCl pH 7.4 and 1mM  $\beta$  mercaptoethanol. Peak fractions were analyzed on 15% SDS PAGE gels. Native PAGE gels were 12%. For cross-linking experiments, 100  $\mu$ g of protein in a total volume of 100  $\mu$ l was treated with 5  $\mu$ l of a 2.3 % freshly prepared solution of glutaraldehyde for 5 minutes at 37°C. The reaction was terminated by addition of 10  $\mu$ l of 1 M Tris-HCl, pH 8.0. Cross-linked proteins were solubilized in loading buffer and separated by 12% SDS-polyacrylamide gel electrophoresis. State was determined after Western blotting with Ni-NTA HRP Conjugate antibody (Cat. no.34530 Qiagen) and ECL detection.
