# Supplementary material for: Prevalence, Specificity and Determinants of Lipid-Interacting PDZ Domains from an In-Cell Screen and In Vitro Binding Experiments
Source: PubMed Central journal article supplement (PMC3563628; doi:10.1371/journal.pone.0054581), 2013-02-04
Supplement: pone.0054581.s007.pdf [file pone.0054581.s007.pdf]

**Table S3.** Comparison between the cellular enrichments observed for the PDZ domains in the screening construct and the reported localizations of the host proteins based on Gene Ontology Annotations (GOA).

| <b>uniprot</b> | <b>Name</b> | <b>GOA</b>                                                                                                                                                                                                                                                                                                       | <b>PDZ domain</b>    | <b>Enrichment</b>                               |
|----------------|-------------|------------------------------------------------------------------------------------------------------------------------------------------------------------------------------------------------------------------------------------------------------------------------------------------------------------------|----------------------|-------------------------------------------------|
| Q02410         | APBA1       | synaptic vesicle                                                                                                                                                                                                                                                                                                 | APBA1_1              | Discrete plasma membrane                        |
|                |             |                                                                                                                                                                                                                                                                                                                  | APBA1_2              | Discrete plasma membrane                        |
| O96018         | APBA3       | cytoplasm<br>membrane<br>perinuclear region of cytoplasm                                                                                                                                                                                                                                                         | APBA3_2              | Discrete plasma membrane                        |
| O14936         | CASK        | nucleus<br>nuclear lamina<br>cytoplasm<br>plasma membrane<br>cell-cell junction<br>actin cytoskeleton<br>nuclear matrix<br>presynaptic membrane<br>cilium membrane<br>basement membrane                                                                                                                          | CASK                 | Strong plasma membrane                          |
| Q70Z35         | DEPDC2      | intracellular                                                                                                                                                                                                                                                                                                    | DEPDC2_2             | Subnuclear organelles                           |
| Q8TB45         | DEPDC6      | intracellular                                                                                                                                                                                                                                                                                                    | DEPDC6               | Subnuclear organelles<br>Bright cytosolic spots |
| Q9P202         | DFNB31      | photoreceptor inner segment<br>stereocilia ankle link complex<br>membrane fraction<br>soluble fraction<br>cytoplasm<br>actin filament<br>cilium<br>axon<br>dendrite<br>growth cone<br>photoreceptor connecting cilium<br>stereocilium<br>stereocilium bundle<br>cell projection<br>neuronal cell body<br>synapse | DFNB31_1<br>DFNB31_3 | Subnuclear organelles<br>Subnuclear organelles  |
| Q12959         | DLG1        | basolateral plasma membrane<br>endoplasmic reticulum<br>nucleus<br>cytosol                                                                                                                                                                                                                                       | DLG1_2               | Discrete plasma membrane                        |

|        |       |                                                                                                                                                                             |                  |                                                 |
|--------|-------|-----------------------------------------------------------------------------------------------------------------------------------------------------------------------------|------------------|-------------------------------------------------|
|        |       | immunological synapse<br>sarcolemma<br>tight junction<br>plasma membrane<br>postsynaptic density<br>cell junction<br>MPP7-DLG1-LIN7 complex                                 |                  |                                                 |
| Q15700 | DLG2  | plasma membrane<br>cytoplasm<br>postsynaptic membrane<br>cell junction<br>dendrite<br>neuronal cell body<br>synapse<br>juxtapanode region of axon<br>postsynaptic density   | DLG2_2           | Discrete plasma membrane                        |
| P78352 | DLG4  | cell junction<br>cortical cytoskeleton<br>dendrite cytoplasm<br>endocytic vesicle membrane<br>excitatory synapse<br>plasma membrane<br>postsynaptic membrane<br>synaptosome | DLG4_3           | Discrete plasma membrane                        |
| Q9C0E4 | GRIP2 | cytoplasm<br>plasma membrane                                                                                                                                                | GRIP2_6          | Subnuclear organelles                           |
| Q92743 | HTRA1 | extracellular region<br>cytoplasm                                                                                                                                           | HTRA1            | Discrete plasma membrane                        |
| Q14005 | IL16  | extracellular region<br>intracellular<br>nucleus<br>cytoplasm<br>plasma membrane                                                                                            | IL16_1<br>IL16_3 | Bright cytosolic spots<br>Subnuclear organelles |
| O14910 | LIN7A | plasma membrane<br>tight junction<br>postsynaptic density<br>basolateral plasma membrane<br>synaptosome<br>cell junction<br>synapse<br>postsynaptic membrane                | LIN7A            | Discrete plasma membrane                        |
| Q8TBB1 | LNX1  | cytoplasm                                                                                                                                                                   | LNX1_4           | Bright cytosolic spots                          |

|        |       |                                                                                                                                                                                                      |                    |                                                    |
|--------|-------|------------------------------------------------------------------------------------------------------------------------------------------------------------------------------------------------------|--------------------|----------------------------------------------------|
| Q8N448 | LNX2  | NA                                                                                                                                                                                                   | LNX2_1             | Discrete plasma membrane<br>Bright cytosolic spots |
|        |       |                                                                                                                                                                                                      | LNX2_4             | Bright cytosolic spots                             |
| Q96QZ7 | MAG11 | cytoplasm<br>plasma membrane<br>cell-cell junction<br>tight junction<br>membrane<br>cell junction<br>cell projection                                                                                 | MAG11_6            | Subnuclear organelles                              |
| Q86UL8 | MAG12 | nucleus<br>cytoplasm<br>plasma membrane<br>tight junction<br>postsynaptic density<br>cell junction<br>synaptosome<br>slit diaphragm<br>protein complex<br>synapse<br>perinuclear region of cytoplasm | MAG12_4            | Subnuclear organelles                              |
| Q5TCQ9 | MAG13 | intracellular<br>nucleus<br>plasma membrane<br>tight junction                                                                                                                                        | MAG13_3<br>MAG13_6 | Bright cytosolic spots<br>Discrete plasma membrane |
| P55196 | MLLT4 | nucleus<br>cytosol<br>plasma membrane<br>cell-cell junction<br>adherens junction                                                                                                                     | MLLT4              | Discrete plasma membrane                           |
| O75970 | MPDZ  | cytoplasm<br>plasma membrane<br>tight junction<br>postsynaptic density<br>apical plasma membrane<br>synaptosome<br>cell junction<br>dendrite<br>synapse<br>postsynaptic membrane                     | MPDZ_6<br>MPDZ_7   | Subnuclear organelles<br>Strong plasma membrane    |
| Q00013 | MPP1  | membrane fraction<br>integral to plasma membrane                                                                                                                                                     | MPP1               | Discrete plasma membrane                           |

|        |       |                                                                                                                                                                                  |        |                                                   |
|--------|-------|----------------------------------------------------------------------------------------------------------------------------------------------------------------------------------|--------|---------------------------------------------------|
|        |       | cortical cytoskeleton<br>stereocilium<br>cell projection                                                                                                                         |        |                                                   |
| Q9NZW5 | MPP6  | plasma membrane                                                                                                                                                                  | MPP6   | Discrete plasma membrane                          |
| Q5T2T1 | MPP7  | adherens junction<br>tight junction<br>membrane<br>cell junction                                                                                                                 | MPP7   | Discrete plasma membrane                          |
| Q8TEW0 | PAR3  | cytosol<br>spindle<br>plasma membrane<br>cell-cell junction<br>adherens junction<br>tight junction<br>cell cortex<br>endomembrane system<br>cell junction<br>apical part of cell | PAR3_1 | Discrete plasma membrane<br>Subnuclear organelles |
| Q9NPB6 | PAR6A | ruffle<br>nucleus<br>cytosol<br>plasma membrane<br>cell cortex<br>tight junction<br>cell junction<br>cell projection<br>apical part of cell                                      | PAR6A  | Discrete plasma membrane                          |
| Q9BYG4 | PAR6G | cytosol<br>plasma membrane<br>tight junction<br>cell junction                                                                                                                    | PAR6G  | Discrete plasma membrane<br>Subnuclear organelles |
| Q86UT5 | PDZ3  | cytosol<br>plasma membrane<br>brush border<br>subapical complex<br>apical part of cell                                                                                           | PDZ3_4 | Discrete plasma membrane                          |
| Q9H5P4 | PDZ7  | nucleus<br>cilium<br>cell projection                                                                                                                                             | PDZ7_2 | Bright cytosolic spots                            |
| Q5EBL8 | PDZ11 | extracellular region<br>cytosol<br>basolateral plasma membrane                                                                                                                   | PDZ11  | Subnuclear organelles                             |

|        |         |                                                                                                                                                                                                                                           |                      |                                                      |
|--------|---------|-------------------------------------------------------------------------------------------------------------------------------------------------------------------------------------------------------------------------------------------|----------------------|------------------------------------------------------|
| Q5T2W1 | PDZK1   | cytoplasm<br>membrane<br>brush border membrane                                                                                                                                                                                            | PDZK1_1              | Discrete plasma membrane                             |
| Q9UPQ7 | PDZRN3  | neuromuscular junction                                                                                                                                                                                                                    | PDZRN3_1<br>PDZRN3_2 | Discrete plasma membrane<br>Discrete plasma membrane |
| Q96SB3 | PPP1R9B | protein phosphatase type 1<br>complex<br>nucleus<br>cytoplasm<br>cytoskeleton<br>plasma membrane<br>adherens junction<br>lamellipodium<br>cell junction<br>filopodium<br>ruffle membrane<br>cell projection<br>dendritic spine<br>synapse | PPP1R9B              | Discrete plasma membrane                             |
| Q8TEU7 | RAPGEF6 | intracellular<br>nucleus<br>cytoplasm<br>plasma membrane                                                                                                                                                                                  | RAPGEF6              | Bright cytosolic spots                               |
| Q9H190 | SCDBP2  | intracellular<br>cytoplasm<br>plasma membrane                                                                                                                                                                                             | SCDBP2_1<br>SCDBP2_2 | Subnuclear organelles<br>Subnuclear organelles       |
| Q14160 | SCRIB   | cytoplasm<br>plasma membrane<br>cell-cell junction<br>adherens junction<br>membrane<br>Scrib-APC-beta-catenin complex<br>cell leading edge<br>postsynaptic membrane<br>presynaptic membrane                                               | SCRIB_4              | Subnuclear organelles                                |
| Q9Y566 | SHANK1  | membrane fraction<br>cytoplasm<br>plasma membrane<br>postsynaptic density<br>dendrite<br>dendritic spine<br>synapse<br>postsynaptic membrane                                                                                              | SHANK1               | Discrete plasma membrane<br>Subnuclear organelles    |

|        |          |                                                                                                                                                                                                                                                                                                       |                          |                                                |
|--------|----------|-------------------------------------------------------------------------------------------------------------------------------------------------------------------------------------------------------------------------------------------------------------------------------------------------------|--------------------------|------------------------------------------------|
|        |          | excitatory synapse<br>ionotropic glutamate receptor complex                                                                                                                                                                                                                                           |                          |                                                |
| O43166 | SIPA1L1  | intracellular<br>cytoplasm<br>cytoskeleton<br>plasma membrane<br>postsynaptic density<br>synaptosome<br>cell junction<br>dendritic spine<br>synapse<br>postsynaptic membrane                                                                                                                          | SIPA1L1                  | Subnuclear organelles                          |
| O14745 | SLC9A3R1 | ruffle<br>cytoplasm<br>centrosome<br>plasma membrane<br>microvillus<br>endomembrane system<br>actin cytoskeleton<br>apical plasma membrane<br>filopodium<br>brush border membrane<br>microvillus membrane<br>cell projection<br>intracellular membrane-bounded organelle<br>nucleus<br>cell periphery | SLC9A3R1_1               | Subnuclear organelles                          |
| Q15599 | SLC9A3R2 | nucleus<br>cytoplasm<br>endomembrane system<br>plasma membrane<br>apical plasma membrane                                                                                                                                                                                                              | SLC9A3R2_1<br>SLC9A3R2_2 | Subnuclear organelles<br>Subnuclear organelles |
| Q9NSN8 | SNTG1    | nucleus<br>cytoplasm<br>cytoskeleton<br>syntrophin complex<br>ruffle membrane                                                                                                                                                                                                                         | SNTG1                    | Subnuclear organelles                          |
| Q9UMS6 | SYNPO2   | nucleus<br>cytoplasm<br>actin cytoskeleton<br>Z disc                                                                                                                                                                                                                                                  | SYNPO2                   | Discrete plasma membrane                       |
| O95049 | TJP3     | plasma membrane<br>tight junction                                                                                                                                                                                                                                                                     | TJP3_1                   | Subnuclear organelles                          |

apical plasma membrane  
cell junction

---
